1 **Characterization of an  $\alpha$ -glucosidase enzyme conserved in *Gardnerella* spp. isolated from the**  
2 **human vaginal microbiome**

3

4 **Pashupati Bhandari<sup>a</sup>, Jeffrey P. Tingley<sup>b,c</sup>, David R. J. Palmer<sup>d</sup>, D. Wade Abbott<sup>b,c</sup>**  
5 **and Janet E. Hill<sup>a,#</sup>**

6

7 <sup>a</sup>Department of Veterinary Microbiology, Western College of Veterinary Medicine, University of  
8 Saskatchewan, 52 Campus Drive, Saskatoon, Saskatchewan, S7N 5B4, Canada

9 <sup>b</sup>Lethbridge Research and Development Centre, Agriculture and Agri-Food Canada, 5401-1<sup>st</sup> Ave  
10 S, Lethbridge, Alberta, T1J 4B1, Canada

11 <sup>c</sup>Department of Chemistry and Biochemistry, University of Lethbridge, 4401 University Dr W,  
12 Lethbridge, AB T1K 3M4, Canada

13 <sup>d</sup>Department of Chemistry, University of Saskatchewan, 110 Science Place, Saskatoon, SK S7N  
14 5C9, Canada

15

16 <sup>#</sup>To whom correspondence should be addressed

17

18 e-mail addresses:

19 PB: [pab230@mail.usask.ca](mailto:pab230@mail.usask.ca)

20 JPT: [jeffrey.tingley@uleth.ca](mailto:jeffrey.tingley@uleth.ca)

21 DRJP: [dave.palmer@usask.ca](mailto:dave.palmer@usask.ca)

22 DWA: [wade.abbott@canada.ca](mailto:wade.abbott@canada.ca)

23 JEH: [Janet.Hill@usask.ca](mailto:Janet.Hill@usask.ca)

## 24 **Abstract**

25 *Gardnerella* spp. in the vaginal microbiome are associated with bacterial vaginosis, a dysbiosis in  
26 which a lactobacilli dominant microbial community is replaced with mixed aerobic and anaerobic  
27 bacteria including *Gardnerella* species. The co-occurrence of multiple *Gardnerella* species in the  
28 vaginal environment is common, but different species are dominant in different women.  
29 Competition for nutrients, particularly glycogen present in the vaginal environment, could play an  
30 important role in determining the microbial community structure. Digestion of glycogen into  
31 products that can be taken up and further processed by bacteria requires the combined activities of  
32 several enzymes collectively known as amylases, which belong to glycoside hydrolase family 13  
33 (GH13) within the CAZy classification system. GH13 is a large and diverse family of proteins,  
34 making prediction of their activities challenging. SACCHARIS annotation of the GH13 family in  
35 *Gardnerella* resulted in identification of protein domains belonging to eight subfamilies.  
36 Phylogenetic analysis of predicted amylase sequences from 26 *Gardnerella* genomes  
37 demonstrated that a putative  $\alpha$ -glucosidase-encoding sequence, CG400\_06090, was conserved in  
38 all species in the genus. The predicted  $\alpha$ -glucosidase enzyme was expressed, purified and  
39 functionally characterized. The enzyme was active on a variety of maltooligosaccharides over a  
40 broad pH range (4.0 - 8) with maximum activity at pH 7. The  $K_m$ ,  $k_{cat}$  and  $k_{cat}/K_m$  values for the  
41 substrate 4-nitrophenyl  $\alpha$ -D-glucopyranoside were 8.3  $\mu$ M, 0.96  $\text{min}^{-1}$  and 0.11  $\mu\text{M}^{-1}\text{min}^{-1}$   
42 respectively. Glucose was released from maltose, maltotriose, maltotetraose and maltopentaose,  
43 but no products were detected on thin layer chromatography when the enzyme was incubated with  
44 glycogen. Our findings show that *Gardnerella* spp. produce an  $\alpha$ -glucosidase enzyme that may  
45 contribute to the complex and multistep process of glycogen metabolism by releasing glucose from  
46 maltooligosaccharides.

47

48 **Keywords:** glycogen; *Gardnerella*; vaginal microbiome;  $\alpha$ -glucosidase; glycoside hydrolase

49

## 50 **Introduction**

51 *Gardnerella* spp. in the vaginal microbiome are hallmarks of bacterial vaginosis, a  
52 condition characterized by replacement of the lactobacilli dominant microbial community with  
53 mixed aerobic and anaerobic bacteria including *Gardnerella*. This dysbiosis is associated with  
54 increased vaginal pH, malodorous discharge and the presence of biofilm (1). In addition to  
55 troubling symptoms, the presence of abnormal vaginal microbiota is associated with increased risk  
56 of HIV transmission and infection with other sexually transmitted pathogens such as *Neisseria*  
57 *gonorrhoeae* and *Trichomonas* spp. (2, 3). Historically, *Gardnerella* has been considered a single  
58 species genus. Jayaprakash *et al.* used cpn60 barcode sequences to divide *Gardnerella* spp. into  
59 four subgroups (A-D) (4), and this framework was supported by whole genome sequence  
60 comparison (5, 6). More recently, Vaneechoutte *et al.* emended the classification of *Gardnerella*  
61 based on whole genome sequence comparison, biochemical properties and matrix-assisted laser  
62 desorption ionization time-of-flight mass spectrometry and proposed the addition of three novel  
63 species: *Gardnerella leopoldii*, *Gardnerella piovii* and *Gardnerella swidsinskii* (7).

64 Colonization with multiple *Gardnerella* species is common, and different species are  
65 dominant in different women (8). Understanding factors that contribute to differential abundance  
66 is important since the species may differ in virulence (6) and they are variably associated with  
67 clinical signs (8, 9). Several factors, including inter-specific competition, biofilm formation and  
68 resistance to antimicrobials could contribute to the differential abundance of the different species.  
69 Khan *et al.* showed that resource-based scramble competition is frequent among *Gardnerella*

70 subgroups (10). Glycogen is a significant nutrient for vaginal microbiota, but previous reports on  
71 the growth of *Gardnerella* spp. on glycogen containing medium are inconsistent (11). Species may  
72 differ in their ability to digest glycogen and utilize the breakdown products, which may in turn  
73 contribute to determining microbial community structure.

74 Glycogen is an energy storage molecule, which consists of linear chains of approximately  
75 13 glucose molecules covalently linked with  $\alpha$ -1,4 glycosidic linkages, with branches attached  
76 through  $\alpha$ -1,6 glycosidic bonds (12, 13). A single glycogen molecule consists of approximately  
77 55,000 glucose residues with a molecular mass of  $\sim 10^7$  kDa (14). The size of glycogen particles  
78 can vary with source; from 10-44 nm in human skeletal muscle to approximately 110-290 nm in  
79 human liver (15). Glycogen is deposited into the vaginal lumen by epithelial cells under the  
80 influence of estrogen (16), and the concentration of cell-free glycogen in vaginal fluid varies  
81 greatly, ranging from 0.1 - 32  $\mu\text{g}/\mu\text{L}$  (17). This long polymeric molecule must be digested into  
82 smaller components that can be taken up by bacterial cells and metabolized further (18, 19).

83 Glycogen digestion is accomplished by the coordinated action of enzymes collectively  
84 described as amylases (20). A large majority of these enzymes belong to family 13 within the  
85 glycosyl hydrolase class (GH13) of carbohydrate active enzymes (CAZymes) (21). GH13 enzymes  
86 are further classified into more than 43 subfamilies based on structure and activity (22). For  
87 example, subfamily 23 is primarily composed of  $\alpha$ -glucosidases, which are exo-acting enzymes  
88 that act on  $\alpha$ -1,4 glycosidic bonds from the non-reducing end to release glucose; subfamily 32 is  
89 composed of  $\alpha$ -amylases, endo-acting enzymes that cleave  $\alpha$ -1,4 glycosidic bonds to produce  
90 maltose and  $\alpha$ -limit dextrin; and subfamily 14 contains debranching enzymes, such as pullulanase,  
91 which target  $\alpha$ -1,6 glycosidic bonds (15, 23). Limited information is available on glycogen  
92 degradation mechanisms in the vaginal microbiome. Although it has been demonstrated that

93 vaginal secretions exhibit amylase activity that can degrade glycogen (19), the role of bacterial  
94 amylase enzymes in this process is unknown and there is limited information about glycogen  
95 metabolism by clinically important bacteria such as *Gardnerella* spp..

96 The objective of the current study was to annotate GH13 enzymes in *Gardnerella* spp. and  
97 to characterize the activity of a putative  $\alpha$ -glucosidase conserved among all *Gardnerella* spp..

98

## 99 **Methods**

100

### 101 ***Gardnerella* isolates**

102 Isolates of *Gardnerella* used in this study were from a previously described culture  
103 collection (6) and included representatives of *cpn60* subgroup A (*G. leopoldii* (n = 4), *G.*  
104 *swidsinskii* (n = 6), other (n = 1)), subgroup B (*G. piovii* (n = 5), Genome sp. 3 (n = 2)), subgroup  
105 C (*G. vaginalis* (n = 6)), and subgroup D (Genome sp. 8 (n = 1), Genome sp. 9 (n = 1)). Whole  
106 genome sequences of these isolates had been determined previously (BioProject Accession  
107 PRJNA394757) and annotated by the NCBI Prokaryotic Genome Annotation Pipeline (PGAP)  
108 (24).

109

### 110 **Identification and functional annotation of putative amylase sequences**

111 Putative amylase sequences were identified in proteomes of 26 *Gardnerella* isolates used  
112 in this study based on the PGAP annotations. Multiple sequence alignments of predicted amylase  
113 sequences were performed using CLUSTALw with results viewed and edited in AliView (version  
114 1.18) (25) prior to phylogenetic tree building using PHYLIP (26). SignalP v 5.0 (27) and  
115 SecretomeP 2.0 (28) were used to identify signal peptides.

116 Putative amylolytic enzymes in *G. vaginalis* ATCC 14018 and *G. swidsinskii* GV37  
117 (genomes available in the CAZy database) were identified using dbCAN, and predicted sequences  
118 were run through the SACCHARIS pipeline. SACCHARIS combines user sequences with CAZy  
119 derived sequences and trims sequences to the catalytic domain using dbCAN2 (29). Domain  
120 sequences were aligned with MUSCLE (30), and a best-fit model was generated with ProfTest  
121 (31). Final trees were generated with FastTree (32) and visualized with iTOL (33). Alignment of  
122 CG400\_06090 from *G. leopoldii* NR017 to orthologues from *Halomonas* sp. (BAL49684.1),  
123 *Xanthomonas campestris* (BAC87873.1), and *Culex quinquefasciatus* (ASO96882.1) was done  
124 using CLUSTALw and visualized in ESPript (34). A predicted structure model of CG400\_06090  
125 was aligned with *Halomonas* sp. HaG (BAL49684.1, PDB accession 3WY1) (35) to identify  
126 putative catalytic residues using PHYRE2 (36). BLASTp (37) alignment of CAZy derived  
127 sequences from reference genomes to a database of the predicted proteomes of 26 study isolates  
128 was conducted to identify orthologs.

129

### 130 **Expression and purification of the CG400\_06090 gene product**

131 Genomic DNA from *G. leopoldii* NR017 was extracted using a modified salting out  
132 procedure, and the CG400\_06090 open reading frame (locus tag CG400\_06090 in GenBank  
133 accession NNRZ01000007, protein accession RFT33048) was PCR amplified with primers  
134 JH0729-F (5' ATG CAT GCG CAT TAT ACG ATC ATG CTC-3') and JH0730-R (5' ATG GTA  
135 CCT TAC ATT CCA AAC ACT GCA-3'). Underlined sequences indicate *SphI* and *KpnI*  
136 restriction enzyme sites. PCR reaction contained 1 × PCR reaction buffer (0.2 M Tris-HCl pH 8.4,  
137 0.5 M KCl), 200 μM each dNTPs, 2.5 mM MgCl<sub>2</sub>, 400 nM each primer, 1 U/reaction of Platinum  
138 Taq DNA polymerase high-fidelity (5 units/μL in 50% glycerol, 20 mM Tris-HCl, 40 mM NaCl,

139 0.1 mM EDTA, and stabilizers) (Life Technologies) and 2  $\mu$ L of template DNA, in a final volume  
140 of 50  $\mu$ L. PCR was performed with following parameters: initial denaturation at 94 °C for 3  
141 minutes followed by (denaturation at 94 °C, 15 seconds; annealing at 60 °C, 15 seconds and  
142 extension at 72 °C, 2 minutes; 35 cycles), and final extension at 72 °C for 5 minutes. Purified PCR  
143 products were digested with *KpnI* and *SphI* and ligated into expression vector pQE-80L (Qiagen,  
144 Mississauga, ON) digested with same restriction endonucleases. The resulting recombinant  
145 plasmid was used to transform One Shot TOP10 chemically competent *E. coli* cells (Invitrogen,  
146 Carlsbad, California). Colony PCR was performed to identify transformants containing vector with  
147 insert. Insertion of the putative amylase gene in-frame with the N-terminal 6 $\times$ Histidine tag was  
148 confirmed by sequencing of the purified plasmid.

149 *E. coli* cells containing the plasmid were grown overnight at 37 °C in LB medium with 100  
150  $\mu$ g/ml ampicillin. Overnight culture was diluted 1:60 in fresh medium to a final volume of 50 mL,  
151 and the culture was incubated at 37 °C with shaking at 225 rpm until it reached an OD<sub>600</sub> of 0.6.  
152 At this point, expression was induced with 0.1 mM IPTG and a further 4 hours of incubation was  
153 done at 37°C at 225 rpm. Cells were harvested by centrifugation at 10,000  $\times$  g for 30 mins and the  
154 pellet was resuspended in lysis buffer (50 mM NaH<sub>2</sub>PO<sub>4</sub>, 300 mM NaCl, 10 mM imidazole, pH  
155 8.0). Lysozyme was added to 1 mg/mL and cells were lysed by sonication (8 mins total run time  
156 with 15 sec on and 30 sec off). The lysate was clarified by centrifugation at 10,000  $\times$  g for 30 mins  
157 at 4 °C and the supernatant was applied to an Ni-NTA affinity column according to the  
158 manufacturer's instructions (Qiagen, Germany). Bound proteins were washed twice with wash  
159 buffer (50 mM NaH<sub>2</sub>PO<sub>4</sub>, 300 mM NaCl, 20 mM imidazole, pH 8.0) and eluted with elution buffer  
160 (50 mM NaH<sub>2</sub>PO<sub>4</sub>, 300 mM NaCl, 250 mM imidazole, pH 8.0). Eluted protein was buffer  
161 exchanged with the same elution buffer but without imidazole using 30 kDa MWCO protein

162 concentrator (ThermoFisher Scientific). Final protein concentration was measured by  
163 spectrophotometry.

164

### 165 **Enzyme assay and kinetics**

166 Purified protein was tested for  $\alpha$ -glucosidase activity by measuring the release of 4-  
167 nitrophenol from a chromogenic substrate 4-nitrophenyl  $\alpha$ -D-glucopyranoside as described  
168 elsewhere (38). Briefly, 200  $\mu$ L of enzyme solution (50 nM) was added to 200  $\mu$ L of 20 mM 4-  
169 nitrophenyl  $\alpha$ -D-glucopyranoside substrate and the reaction mixture was incubated at 37  $^{\circ}$ C. A 50-  
170  $\mu$ L aliquot of the reaction mixture was removed and added to 100  $\mu$ L of 1 M Na<sub>2</sub>CO<sub>3</sub> solution  
171 every 90 seconds up to 7.5 mins (total 6 different time points). The absorbance of this solution was  
172 measured at 420 nm, and the amount of 4-nitrophenol released was calculated from a standard  
173 curve. To determine activity at different pH values, the substrate was prepared in 50 mM sodium  
174 phosphate buffer (pH 4.0-8.0). Kinetic constants were determined for 4-nitrophenyl  $\alpha$ -D-  
175 glucopyranoside by measuring rate of reaction of enzyme (50 nM) with substrate concentrations  
176 of 0.05, 1, 2, 5, 10, 20 and 25 mM at pH 7. Values were fit to the Michaelis-Menten equation,  $v =$   
177  $k_{cat} [E]_0[S]/(K_m + [S])$ , where  $v$  is the observed rate of reaction,  $[E]_0$  is the initial enzyme  
178 concentration,  $[S]$  is the substrate concentration,  $K_m$  is the Michaelis constant, and  $k_{cat}$  is the  
179 turnover number. Kinetics calculations were performed in GraphPad Prism 8.

180

### 181 **Enzymatic activity on different substrates**

182 The activity of the purified enzyme was examined with different substrates. Briefly, 750  
183  $\mu$ L of enzyme solution (50 nM) was added to 750  $\mu$ L of 3 mM maltose, maltotriose, maltotetraose,  
184 maltopentaose, or 0.1% (w/v) of maltodextrins (MD 4-7, MD 13-17 and MD 16.5-19.5) or bovine



185 liver glycogen in 50 mM sodium phosphate buffer, pH 6.0, and the reaction mixture was incubated  
186 aerobically at 37 °C. Aliquots of the reaction mixture (250 µL) were removed at various time  
187 intervals of incubation and were heat-inactivated at 93 °C for 1 minute. The reaction mixtures were  
188 centrifuged at 10,000 × g for 1 min and supernatant was stored at -20 °C and analyzed by thin layer  
189 chromatography (TLC) and high performance anion exchange chromatography (HPAEC) with  
190 pulsed amperometric detection (PAD). TLC was performed on silica plates in 1-butanol: acetic  
191 acid: distilled water (2:1:1 v/v/v) mobile phase and stained using ethanol: sulfuric acid (70:3 v/v)  
192 solution containing 1% (w/v) orcinol monohydrate (Sigma). HPAEC-PAD samples were diluted  
193 to 50 µM and resolved on a Dionex PA20 column in a mobile phase of 30 mM NaOH and gradient  
194 of 10 mM – 120 mM sodium acetate over 40 min at a flow rate of 0.5 mL min<sup>-1</sup>. Data was analyzed  
195 using Chromeleon v6.80 chromatography data system software. Maltooligosaccharide standards  
196 ranging from maltose to maltopentaose (Carbosynth) were used for both TLC and HPAEC-PAD  
197 analysis; whereas, isomaltotriose, D-panose, and 6-o-a-D-glucosyl-maltose (Carbosynth) were  
198 used to identify minor peaks resolved by HPAEC-PAD.

199

## 200 **Results**

### 201 **Identification of putative amylase sequences**

202 A total of 60 proteins from the 26 study isolates were annotated by PGAP as amylases. After  
203 removal of severely truncated sequences, a multiple sequence alignment of the remaining 42  
204 sequences was trimmed to the uniform length of 290 amino acids. Phylogenetic analysis of these  
205 predicted amylase sequences revealed five clusters, but only one of these clusters contained  
206 orthologous sequences from all 26 isolates (Figure 1). Sequence identities within this cluster were  
207 all 91-100% identical. This conserved sequence (corresponding to GenBank accession

208 WP\_004104790) was annotated as an GH13  $\alpha$ -amylase (EC 3.2.1.1) in all genomes, suggesting it  
209 was an endo-acting enzyme that releases maltooligosaccharides from glycogen.

210 The GH13 family in the CAZy database is a large, polyspecific family targeting  $\alpha$ -glucosyl  
211 linkages. The functional diversity of members in this family can make annotation of new sequences  
212 challenging. In order to predict the activity of the conserved protein identified among the study  
213 isolates, we employed SACCHARIS, which combines CAZyme family trees generated from  
214 biochemically characterized proteins with related sequences of unknown function. Currently, two  
215 *Gardnerella* reference genomes are available in CAZy: *G. vaginalis* ATCC 14018 and *G.*  
216 *swidsinkii* GV37. GH13 family proteins encoded in these *Gardnerella* genomes were identified  
217 and a family tree including all characterized GH13 sequences in the CAZy database was generated  
218 (Figure S1). SACCHARIS annotation of the GH13 family in *Gardnerella* resulted in identification  
219 of protein domains belonging to eight subfamilies (2, 9, 11, 14, 20, 23, 30, 31 and 32). Alignment  
220 with characterized GH13 enzymes from the CAZy database (22) suggested that the conserved  
221 amylase identified in the study isolates was an  $\alpha$ -glucosidase (EC 3.2.1.20), closely related to  
222 subfamilies 23 and 30 of GH13, and not an  $\alpha$ -amylase as annotated in GenBank. Subsequent  
223 examination of the  $\alpha$ -glucosidase with SignalP and SecretomeP indicated that no signal peptide  
224 was present, and that the protein was not likely secreted through a Sec-independent pathway.

225

## 226 **Relationship to other $\alpha$ -glucosidases**

227 A representative sequence of the predicted  $\alpha$ -glucosidase was selected from *G. leopoldii*  
228 (NR017). This sequence (CG400\_06090) was combined with functionally characterized members  
229 of the GH13 CAZy database using SACCHARIS (Figure 2A). CG400\_06090 partitioned with  
230 members of GH13 subfamilies 17, 23 and 30, of which the prominent activity is  $\alpha$ -glucosidase.

231 This clade was expanded to clarify the relationship of CG400\_06090 with related characterized  
232 sequences as an apparently deep-branching member of subfamily 23, although with low bootstrap  
233 support (Figure 2B). When additional, uncharacterized sequences from the CAZy database were  
234 included, CG400\_06090 clustered within subfamily 23 (Figure S2).

235 To identify conserved catalytic residues between CG400\_06090 and characterized  
236 members of GH13, CG400\_06090 was aligned with structurally characterized members of  
237 subfamily 23 (BAL49684.1 and BAC87873.1) and subfamily 17 (ASO96882.1) (Figure 2C). Of  
238 the GH13 catalytic triad, the aspartate nucleophile and the aspartate that stabilizes the transition  
239 state are conserved among the four sequences (39). The glutamate general acid/base, however,  
240 does not appear to be sequence conserved between CG400\_06090 and the GH13 subfamily 23  
241 members. Upon modelling CG400\_06090 in PHYRE2 and aligning with BAL49684.1 (PDBID  
242 3WY1), CG400\_06090 Glu256 did appear to be spatially conserved with the general acid/base  
243 (not shown).

244

#### 245 **Expression and purification of $\alpha$ -glucosidase protein**

246 The *G. leopoldi* NR017 CG400\_06090 open reading frame comprises 1701 base pairs  
247 encoding a 567 amino acid protein, with a predicted mass of 62 kDa. The full-length open reading  
248 frame encoding amino acids 2-567 was PCR-amplified and ligated into vector pQE-80L for  
249 expression in *E. coli* as an N-terminal hexahistidine-tagged protein. A distinct protein band in  
250 SDS-PAGE between 50 kDa and 75 kDa was obtained from IPTG-induced *E. coli* cells compared  
251 with non-induced cells, indicating the expression of the  $\alpha$ -glucosidase protein (Figure 3A). The  
252 recombinant protein was soluble, and was purified using a Ni-NTA spin column (Figure 3B). From  
253 a 50 mL broth culture, approximately 700  $\mu$ L of purified protein at 4.0 mg/mL was obtained.

254

## 255 **Effect of pH on enzyme activity**

256  $\alpha$ -Glucosidase activity of the purified protein was demonstrated by release of 4-nitrophenol  
257 from the chromogenic substrate 4-nitrophenyl  $\alpha$ -D-glucopyranoside. A preliminary analysis of  
258 enzyme activity over pH 3-8 showed that product was produced over a broad pH range from 4.0  
259 to 8.0 (Figure S3). To more precisely examine effects of pH on activity a pH rate profile was  
260 determined and the maximum rate was observed at pH 7.0 (Figure 4A). The dependence of rate on  
261 substrate concentration fit the Michaelis-Menten equation (Figure 4B), with a Michaelis constant  
262 ( $K_m$ ) of 8.3  $\mu$ M, and a  $V_{max}$  96  $\mu$ M/min, corresponding to a  $k_{cat}$  value of 0.96 ( $\pm$  0.01)  $\text{min}^{-1}$  and  
263  $k_{cat}/K_m$  of 0.11  $\mu\text{M}^{-1}\text{min}^{-1}$ .

264

## 265 **Analysis of substrate hydrolysis**

266 Production of glucose was detected when the purified  $\alpha$ -glucosidase was incubated with  
267 maltose (M2), maltotriose (M3), maltotetraose (M4) and maltopentaose (M5) (Figure 5). Samples  
268 analyzed by HPAEC-PAD contained large peaks corresponding to maltooligosaccharides ranging  
269 from maltose to maltopentaose; minor peaks, especially in the maltotetraose and maltopentaose  
270 samples, resolved products not observed in the TLC analysis. These peaks did not align to  
271 isomaltotriose, panose, or 6-o-a-D-glucosyl-maltose standards in HPAEC-PAD (not shown), and  
272 likely represent larger, mixed linkage products. No appreciable activity was detected on  
273 maltodextrins (MD 4-7, MD 13-17 and MD 16.5-19.5) or glycogen (Figure S4).

274

## 275 **Discussion**

276 Glycogen is a major nutrient available to vaginal microbiota and its utilization likely plays  
277 an important role in the survival and success of *Gardnerella* spp. in the vaginal microbiome. The  
278 ability of *Gardnerella* spp. to utilize glycogen has been reported in previous studies. Dunkelburg  
279 *et al.* described the growth of four strains of what was then known as *Haemophilus vaginalis* in  
280 buffered peptone water with 1% glycogen suggesting their ability to ferment glycogen, but no  
281 additional details were provided (40). Similarly, Edmunds reported the glycogen fermenting ability  
282 of 14 out of 15 *Haemophilus vaginalis* isolates, although serum was included in the media (41).  
283 Piot *et al.* examined the starch fermentation ability of 175 *Gardnerella* isolates on Mueller Hinton  
284 agar supplemented with horse serum and found that all *Gardnerella* strains were capable of  
285 hydrolysing starch (42). They did not, however, assess glycogen degradation and further, it is not  
286 clear if serum amylase contained in the media contributed to the observed amylase activity.  
287 Robinson, in his review, reported that starch can be utilized by *Gardnerella* (43) while Catlin in  
288 another review, reported that glycogen utilization is inconsistent in *Gardnerella* (11).

289 Glycogen is digested into smaller products, such as maltose and maltodextrins, by a group  
290 of enzymes collectively known as amylases. Amylases that contribute to glycogen utilization in  
291 the vaginal environment are not well studied. Spear *et al.* (19) suggested a role for a human  
292 amylase enzyme in the breakdown of vaginal glycogen. They detected host-derived pancreatic  $\alpha$ -  
293 amylase and acidic  $\alpha$ -glucosidase in genital fluid samples collected from women and showed that  
294 genital fluid containing these enzymes can degrade the glycogen. The presence of these enzyme  
295 activities alone in vaginal fluid, however, was not correlated with glycogen degradation,  
296 suggesting contributions of activity from the resident microbiota. Many vaginal bacteria likely  
297 produce amylases that contribute to this activity as various anaerobic taxa are known to encode  
298 amylases and digest glycogen (44), however, the contributions of the vaginal microbiota to this

299 process and the importance of these processes to vaginal microbial community dynamics are not  
300 yet well understood. Regardless of the source, amylases digest glycogen into maltose and or  
301 maltooligosaccharides which are transported inside bacteria via ABC transporter systems for  
302 further processing (45).

303 Protein sequences belonging to eight different GH13 subfamilies that could have roles in  
304 glycogen degradation were identified in *G. vaginalis* ATCC 14018 and *G. swidsinskii* GV37  
305 (Figure S1), and multiple amylase-like proteins were detected in the proteomes of additional  
306 *Gardnerella* spp. (Figure 1), all of which were annotated as “alpha-amylase” in the GenBank  
307 records. Our results demonstrate the value of using more nuanced analyses, including dbCAN and  
308 SACCHARIS, to guide discovery of CAZymes based on comparison at a catalytic domain level  
309 to functionally characterized enzymes. Further investigation will be required to demonstrate the  
310 actual functions of these proteins, and how they contribute to carbohydrate-degrading activities of  
311 *Gardnerella* spp..

312 In the phylogenetic analysis of putative amylase sequences, one cluster contained  
313 sequences common to all 26 isolates (Figure 1). Although this protein sequence was annotated as  
314 an  $\alpha$ -amylase, suggesting it would produce maltooligosaccharides from glycogen, SACCHARIS  
315 predicted it to be closely related to  $\alpha$ -glucosidases, which cleave glucose from the non-reducing  
316 end of its substrate. Automated annotation of sequences deposited in primary sequence databases  
317 such as GenBank has resulted in significant problems with functional mis-annotation (46). This  
318 problem is exacerbated by the increasing rate at which whole genome sequences are being  
319 generated and deposited. The genome sequences of the study isolates were annotated using the  
320 NCBI Prokaryotic Genome Annotation Pipeline, which identifies genes and annotates largely

321 based on sequence similarity to previously annotated sequences, thus potentially propagating  
322 incorrect functional annotations.

323 Phylogenetic analysis of GH13 family enzymes showed that the conserved  $\alpha$ -glucosidase  
324 from *Gardnerella* spp. appears to be most closely related to GH13 subfamily 23 (Figure S2).  
325 Primary sequences of GH13 members of amylases have seven highly conserved regions and three  
326 amino acids that form the catalytic triad (23). Comparison of the primary sequence and three-  
327 dimensional model of CG400\_06090 with characterized  $\alpha$ -glucosidases from GH13 subfamily 17  
328 and 23 did show sequence conservation of nucleophile and spatial conservation of the catalytic  
329 triad.

330 Our findings suggest that, although  $\alpha$ -glucosidase does not hydrolyze glycogen, it can  
331 digest smaller maltooligosaccharides. The purified  $\alpha$ -glucosidase enzyme was able to completely  
332 digest maltose and maltotriose to glucose, but digestion of maltotetraose and maltopentaose was  
333 incomplete, suggesting a preference for smaller oligosaccharides (Figure 5). Previously  
334 characterized  $\alpha$ -glucosidase (*algB*) from *Bifidobacterium adolescentis* DSM20083 also showed  
335 higher activity against maltose and maltotriose while no activity was reported against  
336 maltotetraose and maltopentaose (47).  $\alpha$ -Glucosidases can have different substrate specificities  
337 due to the variable affinity of the substrate binding site for particular substrates (48).

338 Most secreted proteins have a short N-terminal signal peptide to guide for extracellular  
339 translocation of the newly synthesized protein (49), however, bacterial proteins can be also  
340 secreted via non-classical secretion pathways in a Sec-independent manner, without having a  
341 signal peptide (28). Analysis of the *Gardnerella*  $\alpha$ -glucosidase sequence with SignalP and  
342 SecretomeP showed that the protein is unlikely to be secreted by either route and thus likely acts  
343 on intracellular substrates including products of extracellular glycogen degradation transported

344 into the cell. Many free-living and host-associated bacteria synthesize glycogen as a storage  
345 molecule (50) but the extent to which this occurs in *Gardnerella* is not known. The possibility that  
346 products of digestion of intracellular glycogen stores are substrates for the  $\alpha$ -glucosidase  
347 characterized in this study remains a question for future study. Purified  $\alpha$ -glucosidase from *G.*  
348 *leopoldii* NR017 was active across a broad pH range of 4.0 to 8.0 (Figure S3) with the highest rate  
349 detected at pH 7.0 (Figure 4A). This is not unexpected for a cytoplasmic enzyme in a host-  
350 associated bacterium, and consistent with at least one other report of an  $\alpha$ -glucosidase from a  
351 commensal bacterium, *Bifidobacterium adolescentis* (47).

352 Our findings show that *Gardnerella* spp. have an  $\alpha$ -glucosidase enzyme that likely  
353 contributes to the complex and multistep process of glycogen utilization by releasing glucose from  
354 maltooligosaccharides. Identification and biochemical characterization of additional enzymes  
355 involved in glycogen metabolism will provide insight into whether utilization of this abundant  
356 carbon source is an important factor in population dynamics and competition among *Gardnerella*  
357 spp.. The functional annotation strategy demonstrated here provides a powerful approach to guide  
358 future experiments aimed at determining enzyme substrates and activities.

359

## 360 **Funding**

361 This research is supported by an NSERC Discovery grant to JEH, and Agriculture and Agri-Food  
362 Canada project number: J-001589 (JPT and DWA). PB is supported by a Devolved Scholarship  
363 from the University of Saskatchewan.

364

## 365 **Conflicts of interest**

366 The authors declare no competing interest.



367

## 368 **Acknowledgements**

369 The authors are grateful to Josseline Ramos-Figueroa, Douglas Fansher and Natasha Vetter  
370 (Department of Chemistry, University of Saskatchewan) for guidance with thin layer  
371 chromatography and Champika Fernando for technical support.

372

## 373 **References**

- 374 1. Nugent RP, Krohn MA, Hillier SL. 1991. Reliability of diagnosing bacterial vaginosis is  
375 improved by a standardized method of gram stain interpretation. *J Clin Microbiol* 29:297–  
376 301.
- 377 2. Martin HL, Richardson BA, Nyange PM, Lavreys L, Hillier SL, Chohan B, Mandaliya K,  
378 Ndinya-Achola JO, Bwayo J, Kreiss J. 1999. Vaginal *Lactobacilli*, microbial flora, and risk  
379 of Human Immunodeficiency virus Type 1 and sexually transmitted disease acquisition. *J*  
380 *Infect Dis* 180:1863–1868.
- 381 3. Taha TE, Hoover DR, Dallabetta GA, Kumwenda NI, Mtimavalye LAR, Yang L-P, Liomba  
382 GN, Broadhead RL, Chipangwi JD, Miotti PG. 1998. Bacterial vaginosis and disturbances  
383 of vaginal flora: association with increased acquisition of HIV. *AIDS* 12.
- 384 4. Paramel Jayaprakash T, Schellenberg JJ, Hill JE. 2012. Resolution and characterization of  
385 distinct cpn60-based subgroups of *Gardnerella vaginalis* in the vaginal microbiota. *PloS*  
386 *One* 7:e43009–e43009.

- 387 5. Ahmed A, Earl J, Retchless A, Hillier SL, Rabe LK, Cherpes TL, Powell E, Janto B, Eutsey  
388 R, Hiller NL, Boissy R, Dahlgren ME, Hall BG, Costerton JW, Post JC, Hu FZ, Ehrlich  
389 GD. 2012. Comparative genomic analyses of 17 clinical isolates of *Gardnerella vaginalis*  
390 provide evidence of multiple genetically isolated clades consistent with subspeciation into  
391 genovars. *J Bacteriol* 194:3922–3937.
- 392 6. Schellenberg JJ, Paramel Jayaprakash T, Withana Gamage N, Patterson MH, Vaneechoutte  
393 M, Hill JE. 2016. *Gardnerella vaginalis* subgroups defined by cpn60 sequencing and  
394 Sialidase activity in isolates from Canada, Belgium and Kenya. *PloS One* 11:e0146510.
- 395 7. Vaneechoutte M, Guschin A, Van Simaey L, Gansemans Y, Van Nieuwerburgh F, Cools P.  
396 2019. Emended description of *Gardnerella vaginalis* and description of *Gardnerella*  
397 *leopoldii* sp. nov., *Gardnerella piotii* sp. nov. and *Gardnerella swidsinskii* sp. nov., with  
398 delineation of 13 genomic species within the genus *Gardnerella*. *Int J Syst Evol Microbiol*  
399 69:679–687.
- 400 8. Hill JE, Albert AYK. 2019. Resolution and cooccurrence patterns of *Gardnerella leopoldii*,  
401 *G. swidsinskii*, *G. piotii*, and *G. vaginalis* within the vaginal microbiome. *Infect Immun*  
402 87:e00532-19.
- 403 9. Balashov SV, Mordechai E, Adelson ME, Gygax SE. 2014. Identification, quantification and  
404 subtyping of *Gardnerella vaginalis* in noncultured clinical vaginal samples by quantitative  
405 PCR. *J Med Microbiol* 63:162–175.
- 406 10. Khan S, Voordouw MJ, Hill JE. 2019. Competition among *Gardnerella* subgroups from the  
407 human vaginal microbiome. *Front Cell Infect Microbiol* 9:374.

- 408 11. Catlin BW. 1992. *Gardnerella vaginalis*: characteristics, clinical considerations, and  
409 controversies. Clin Microbiol Rev 5:213–237.
- 410 12. Meléndez-Hevia E, Waddell TG, Shelton ED. 1993. Optimization of molecular design in the  
411 evolution of metabolism: the glycogen molecule. Biochem J 295 (Pt 2):477–483.
- 412 13. Deng B, Sullivan MA, Chen C, Li J, Powell PO, Hu Z, Gilbert RG. 2016. Molecular  
413 structure of human liver glycogen. PloS One 11:e0150540–e0150540.
- 414 14. Roach PJ, Depaoli-Roach AA, Hurley TD, Tagliabracci VS. 2012. Glycogen and its  
415 metabolism: some new developments and old themes. Biochem J 441:763–787.
- 416 15. Adeva-Andany MM, González-Lucán M, Donapetry-García C, Fernández-Fernández C,  
417 Ameneiros-Rodríguez E. 2016. Glycogen metabolism in humans. BBA Clin 5:85–100.
- 418 16. Cruickshank R, Sharman A. 1934. The biology of the vagina in the human subject. BJOG Int  
419 J Obstet Gynaecol 41:208–226.
- 420 17. Mirmonsef P, Hotton AL, Gilbert D, Gioia CJ, Maric D, Hope TJ, Landay AL, Spear GT.  
421 2016. Glycogen levels in undiluted genital fluid and their relationship to vaginal pH,  
422 estrogen, and progesterone. PloS One 11:e0153553.
- 423 18. Flint HJ, Scott KP, Duncan SH, Louis P, Forano E. 2012. Microbial degradation of complex  
424 carbohydrates in the gut. Gut Microbes 3:289–306.
- 425 19. Spear GT, French AL, Gilbert D, Zariffard MR, Mirmonsef P, Sullivan TH, Spear WW,  
426 Landay A, Micci S, Lee B-H, Hamaker BR. 2014. Human  $\alpha$ -amylase present in lower-

- 427 genital-tract mucosal fluid processes glycogen to support vaginal colonization by  
428 *Lactobacillus*. *J Infect Dis* 210:1019–1028.
- 429 20. Berg JM, Tymoczko JL, Stryer L. 2002. Glycogen breakdown requires the interplay of  
430 several enzymes. *Biochemistry*, 5th ed. W H Freeman, New York.
- 431 21. Cantarel BL, Coutinho PM, Rancurel C, Bernard T, Lombard V, Henrissat B. 2009. The  
432 Carbohydrate-Active EnZymes database (CAZy): an expert resource for Glycogenomics.  
433 *Nucleic Acids Res* 37:D233–D238.
- 434 22. Lombard V, Golaconda Ramulu H, Drula E, Coutinho PM, Henrissat B. 2014. The  
435 carbohydrate-active enzymes database (CAZy) in 2013. *Nucleic Acids Res* 42:D490–D495.
- 436 23. Mehta D, Satyanarayana T. 2016. Bacterial and archaeal  $\alpha$ -amylases: Diversity and  
437 amelioration of the desirable characteristics for industrial applications. *Front Microbiol* 7.
- 438 24. Tatusova T, DiCuccio M, Badretdin A, Chetvernin V, Nawrocki EP, Zaslavsky L, Lomsadze  
439 A, Pruitt KD, Borodovsky M, Ostell J. 2016. NCBI prokaryotic genome annotation  
440 pipeline. *Nucleic Acids Res* 44:6614–6624.
- 441 25. Larsson A. 2014. AliView: a fast and lightweight alignment viewer and editor for large  
442 datasets. *Bioinforma Oxf Engl* 30:3276–3278.
- 443 26. Felsenstein J. 1989. PHYLIP - phylogeny inference package (version 3.2). *Cladistics* 5:164–  
444 166.

- 445 27. Almagro Armenteros JJ, Tsirigos KD, Sønderby CK, Petersen TN, Winther O, Brunak S,  
446 von Heijne G, Nielsen H. 2019. SignalP 5.0 improves signal peptide predictions using deep  
447 neural networks. *Nat Biotechnol* 37:420–423.
- 448 28. Bendtsen JD, Kiemer L, Fausbøll A, Brunak S. 2005. Non-classical protein secretion in  
449 bacteria. *BMC Microbiol* 5:58.
- 450 29. Zhang H, Yohe T, Huang L, Entwistle S, Wu P, Yang Z, Busk PK, Xu Y, Yin Y. 2018.  
451 dbCAN2: a meta server for automated carbohydrate-active enzyme annotation. *Nucleic  
452 Acids Res* 46:W95–W101.
- 453 30. Edgar RC. 2004. MUSCLE: a multiple sequence alignment method with reduced time and  
454 space complexity. *BMC Bioinformatics* 5:113.
- 455 31. Darriba D, Taboada GL, Doallo R, Posada D. 2011. ProtTest 3: fast selection of best-fit  
456 models of protein evolution. *Bioinformatics* 27:1164–1165.
- 457 32. Price MN, Dehal PS, Arkin AP. 2010. FastTree 2 – Approximately Maximum-Likelihood  
458 Trees for Large Alignments. *PLOS ONE* 5:e9490.
- 459 33. Letunic I, Bork P. 2019. Interactive Tree Of Life (iTOL) v4: recent updates and new  
460 developments. *Nucleic Acids Res* 47:W256–W259.
- 461 34. Robert X, Gouet P. 2014. Deciphering key features in protein structures with the new  
462 ENDscript server. *Nucleic Acids Res*, 2014/04/21 ed. 42:W320–W324.

- 463 35. Shen X, Saburi W, Gai Z, Kato K, Ojima-Kato T, Yu J, Komoda K, Kido Y, Matsui H, Mori  
464 H, Yao M. 2015. Structural analysis of the  $\alpha$ -glucosidase HaG provides new insights into  
465 substrate specificity and catalytic mechanism. *Acta Crystallogr Sect D* 71:1382–1391.
- 466 36. Kelley LA, Mezulis S, Yates CM, Wass MN, Sternberg MJE. 2015. The Phyre2 web portal  
467 for protein modeling, prediction and analysis. *Nat Protoc* 10:845–858.
- 468 37. Altschul SF, Gish W, Miller W, Myers EW, Lipman DJ. 1990. Basic local alignment search  
469 tool. *J Mol Biol* 215:403–410.
- 470 38. Angelov A, Putyrski M, Liebl W. 2006. Molecular and biochemical characterization of  
471 alpha-glucosidase and alpha-mannosidase and their clustered genes from the  
472 thermoacidophilic archaeon *Picrophilus torridus*. *J Bacteriol* 188:7123–7131.
- 473 39. Uitdehaag JCM, Mosi R, Kalk KH, van der Veen BA, Dijkhuizen L, Withers SG, Dijkstra  
474 BW. 1999. X-ray structures along the reaction pathway of cyclodextrin glycosyltransferase  
475 elucidate catalysis in the  $\alpha$ -amylase family. *Nat Struct Biol* 6:432–436.
- 476 40. Dunkelberg WE, McVeigh I. 1969. Growth requirements of *Haemophilus vaginalis*. *Antonie*  
477 *Van Leeuwenhoek* 35:129–145.
- 478 41. Edmunds PN. 1962. The biochemical, serological and haemagglutinating reactions of  
479 *Haemophilus vaginalis*. *J Pathol Bacteriol* 83:411–422.
- 480 42. Piot P, Van Dyck E, Totten PA, Holmes KK. 1982. Identification of *Gardnerella*  
481 (*Haemophilus*) *vaginalis*. *J Clin Microbiol* 15:19–24.

- 482 43. Taylor-Robinson D. 1984. The bacteriology of *Gardnerella vaginalis*. Scand J Urol Nephrol  
483 Suppl 86:41.
- 484 44. Nunn KL, Forney LJ. 2016. Unraveling the dynamics of the human vaginal microbiome.  
485 Yale J Biol Med 89:331–337.
- 486 45. Boos W, Shuman H. 1998. Maltose/Maltodextrin System of *Escherichia coli*: Transport,  
487 Metabolism, and Regulation. Microbiol Mol Biol Rev 62:204–229.
- 488 46. Schnoes AM, Brown SD, Dodevski I, Babbitt PC. 2009. Annotation error in public  
489 databases: misannotation of molecular function in enzyme superfamilies. PLoS Comput  
490 Biol 5:e1000605–e1000605.
- 491 47. Van den Broek L, Struijs K, Verdoes J, Beldman G, Voragen A. 2003. Cloning and  
492 characterization of two  $\alpha$ -glucosidases from *Bifidobacterium adolescentis* DSM20083.  
493 Appl Microbiol Biotechnol 61:55–60.
- 494 48. Okuyama M, Saburi W, Mori H, Kimura A. 2016.  $\alpha$ -Glucosidases and  $\alpha$ -1,4-glucan lyases:  
495 structures, functions, and physiological actions. Cell Mol Life Sci 73:2727–2751.
- 496 49. Owji H, Nezafat N, Negahdaripour M, Hajiebrahimi A, Ghasemi Y. 2018. A comprehensive  
497 review of signal peptides: Structure, roles, and applications. Eur J Cell Biol 97:422–441.
- 498 50. Preiss J. 1984. Bacterial glycogen synthesis and its regulation. Annu Rev Microbiol 38:419–  
499 458.
- 500

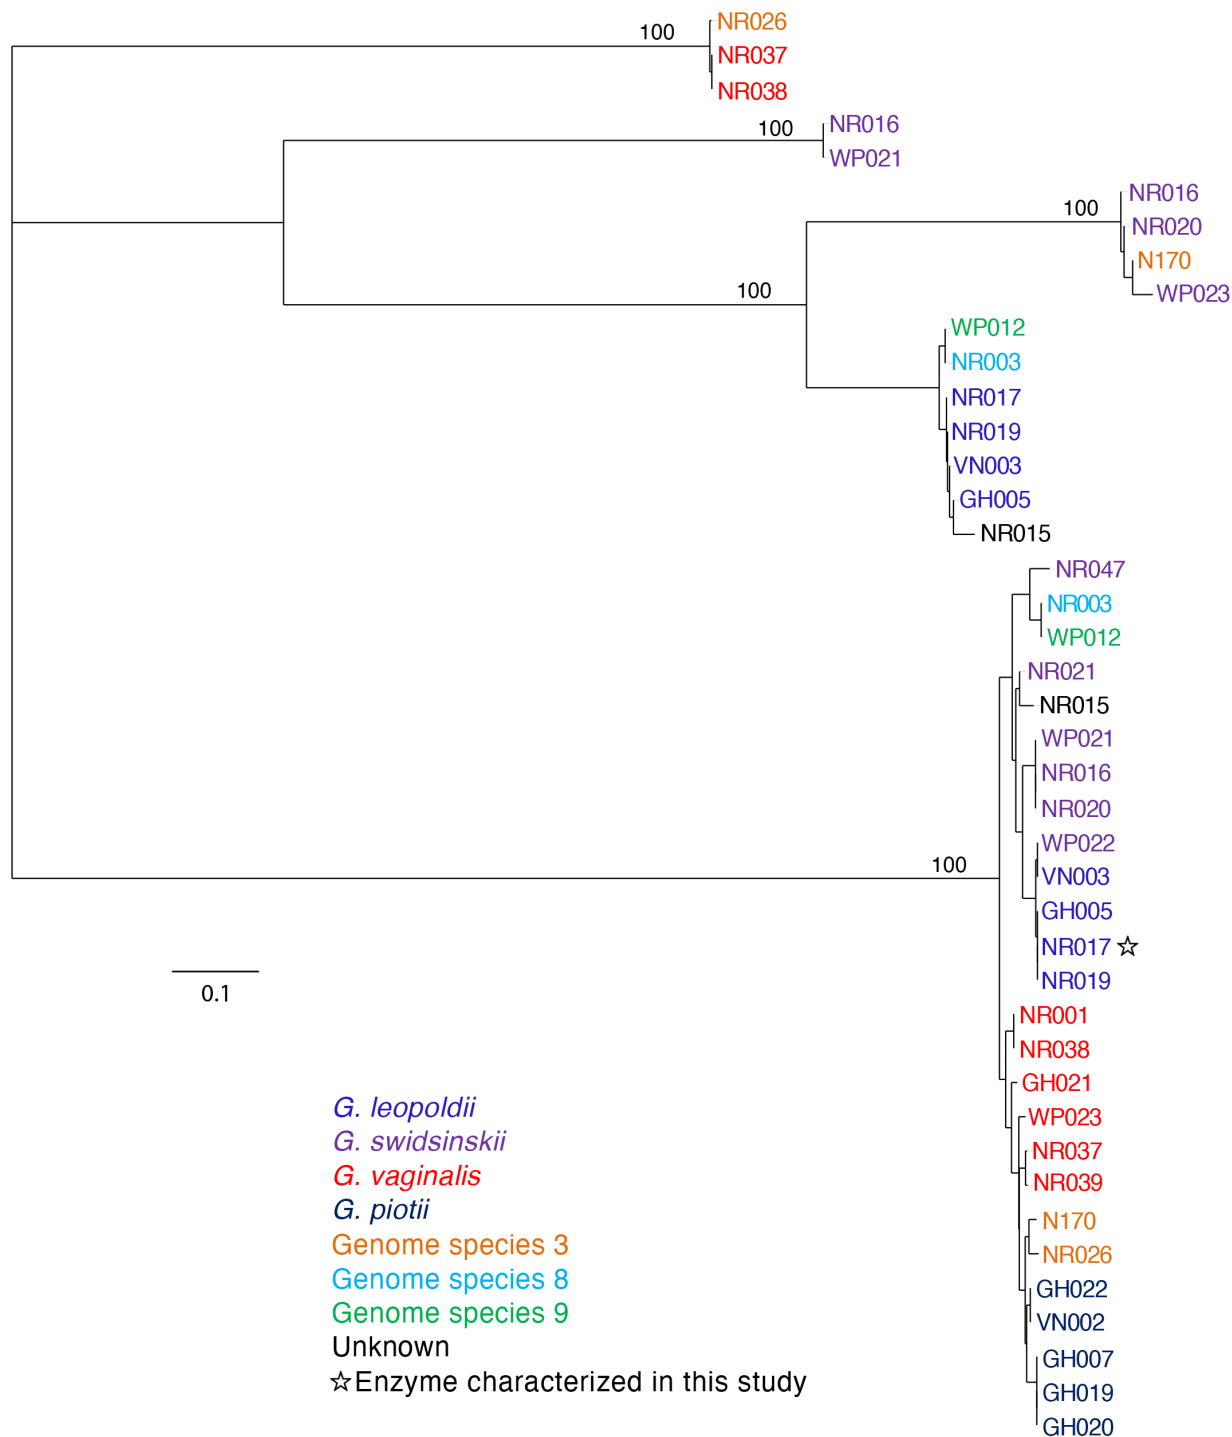

501  
 502 **Figure 1.** Phylogenetic analysis of predicted extracellular amylases protein sequences from 26  
 503 *Gardnerella* genomes. Trees are consensus trees of 100 bootstrap iterations. Bootstrap values are  
 504 shown for major branch points. Species is indicated by label colour according to the legend.



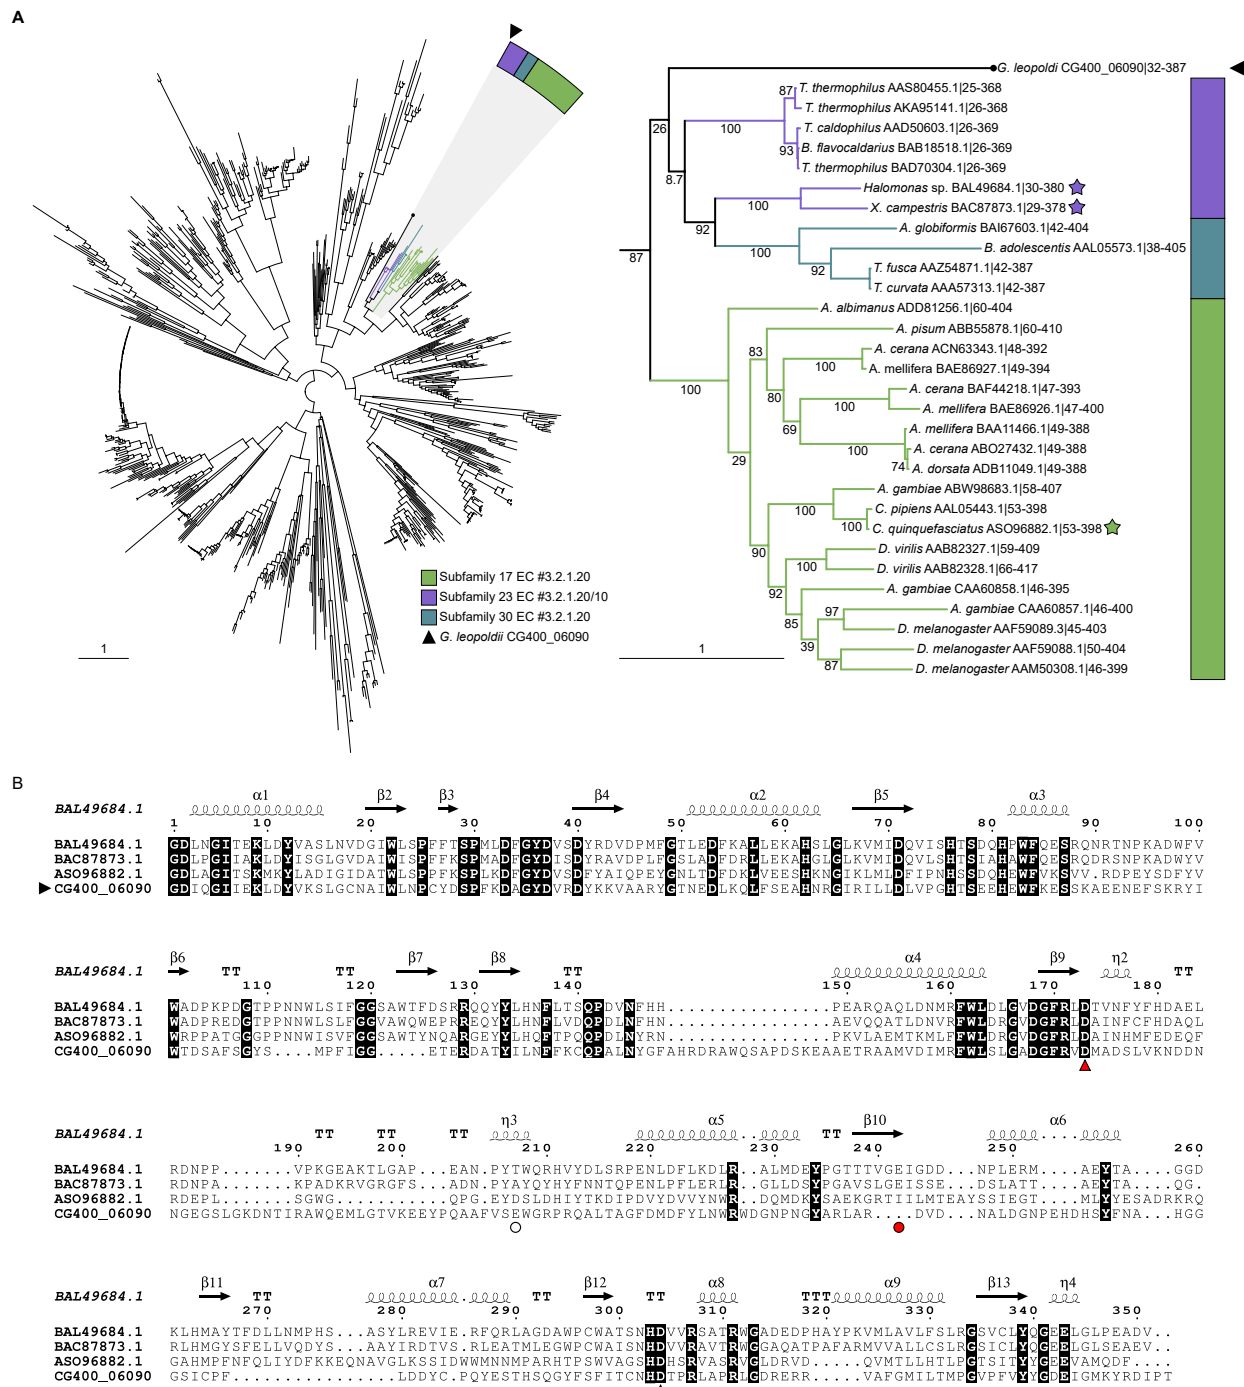

505  
 506 **Figure 2.** (A) Phylogenetic tree of characterized GH13 members in the CAZy database and  
 507 predicted *G. leopoldii* NR017 GH13 sequence CG400\_06090. (B) Expanded tree of subfamilies  
 508 17, 23 and 30. Stars indicate structurally characterized sequences and bootstrap values were  
 509 included. (C) CLUSTAL alignment of the catalytic domain of CG400\_06090 with catalytic

510 domains of GH13 subfamily 23 proteins from *Halomonas* sp. (BAL49684.1) and *Xanthomonas*  
511 *campestris* (BAC87873.1), and subfamily 17 protein from *Culex quinquefasciatus* (ASO96882.1).  
512 Red arrows indicate the conserved members of the catalytic triad, and a red circle indicates the  
513 acid/base (Glu242) in BAL49684.1 and BAC87873.1. White circle indicates the predicted  
514 acid/base in CG400\_06090. Invariant sequences are highlighted in black.  
515

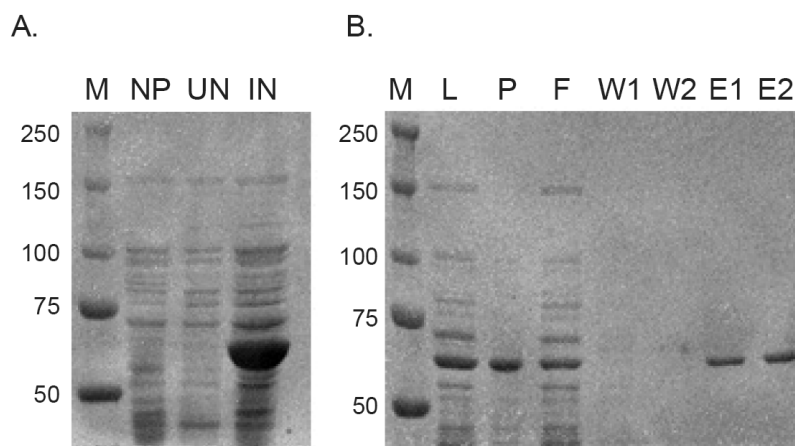

516

517 **Figure 3.** Production and purification of  $\alpha$ -glucosidase protein. (A) A protein of the predicted  
518 mass of 62 kDa was observed in induced cultures. M: size marker, NP: *E. coli* with no vector, UN:  
519 uninduced culture, IN: induced with IPTG. Numbers on the left indicate the marker size in kDa.

520 (B) Fractions from Ni-NTA affinity purification of His-tagged recombinant protein. M: size  
521 marker, L: lysate, P: pellet, F: flow-through, W1: first wash, W2: second wash, E1: first elution,  
522 E2: second elution.

523

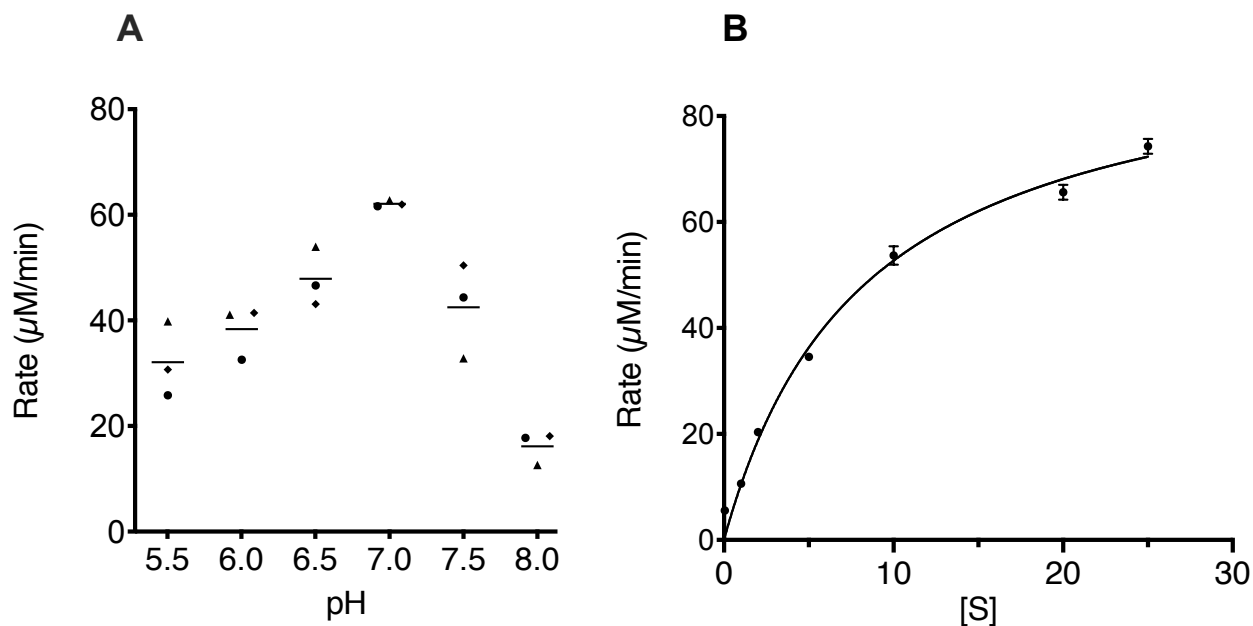

524

525 **Figure 4.** (A) pH-rate profile of  $\alpha$ -glucosidase. Each point represents the average of two technical  
526 replicates for each of three independent experiments as indicated by different shapes. Horizontal  
527 lines indicate the mean. (B) Michaelis-Menten plot. Results shown are the average of three  
528 independent experiments, with error bars indicating standard deviation. The line represents the fit  
529 to the Michaelis-Menten equation.

530

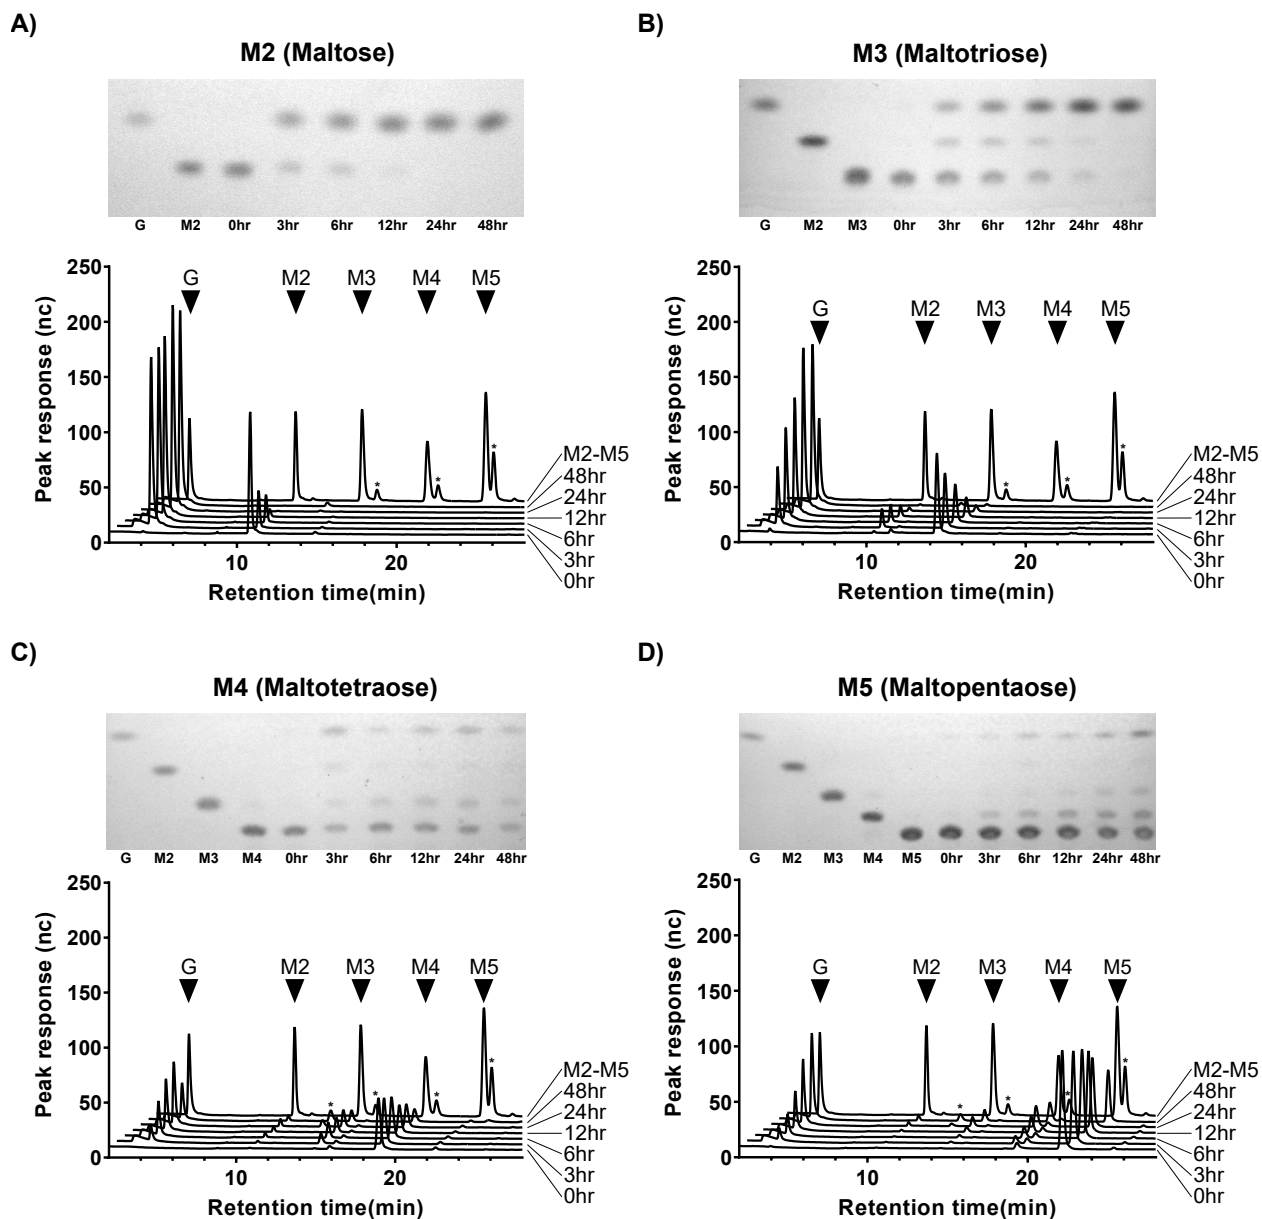

531  
532 **Figure 5.**  $\alpha$ -glucosidase CG400\_06090 digests of maltose to maltopentaose (A-D). Each panel  
533 consists of a TLC plate and HPAEC-PAD trace of CG400\_06090 digests of M2-M5 between 0hr  
534 and 48hr. Major peaks from M2-M5 standards are denoted with black triangles while stars  
535 represent unique, undefined oligosaccharides.

536

537

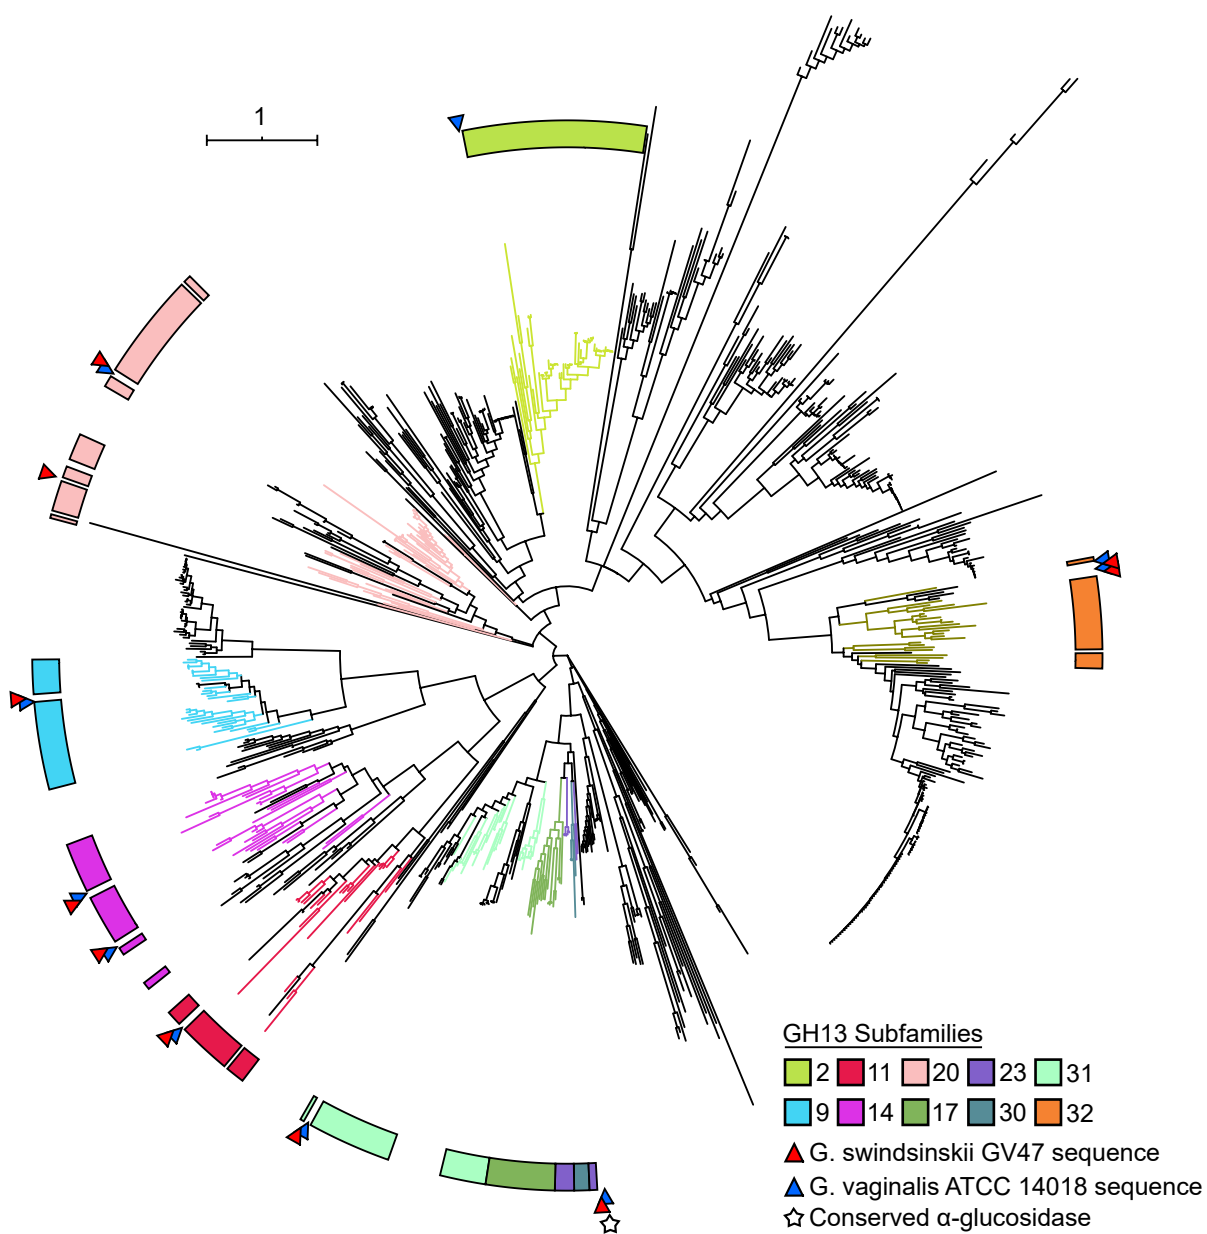

**Figure S1.** Phylogenetic tree of GH13 functionally characterized members with predicted GH13 domains from *G. swindsinskii* GV37 (red arrow) and *G. vaginalis* ATCC 14018 (blue arrow). Tree branches are coloured based on GH13 subfamily. The conserved  $\alpha$ -glucosidase between the 26 proteomes is denoted by a white star. Trees were generated using SACCHARIS and viewed in iTOL.

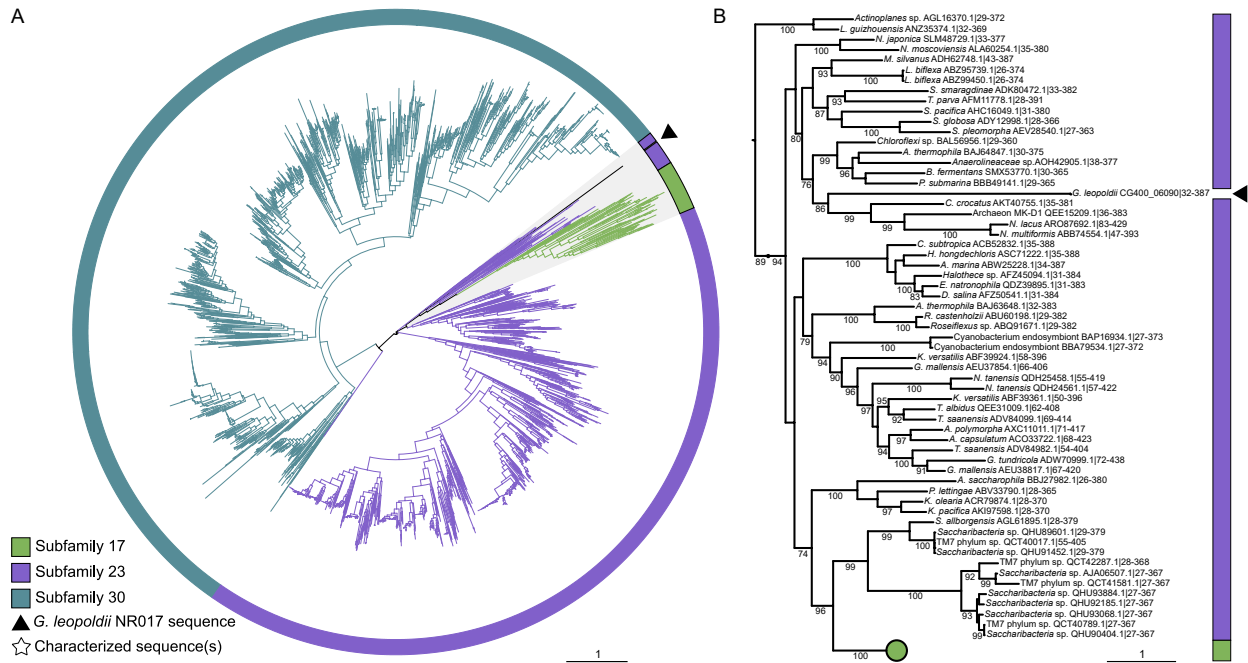

**Figure S2.** (A) Phylogenetic tree of all GH13 subfamily 17, 23 and 30 members in the CAZy database and *G. leopoldii* CG400\_06090. Branch colour is based on GH13 subfamily and functionally characterized proteins are indicated with stars. The clade highlighted in grey including *G. leopoldii* CG400\_06090 and its closest relatives is expanded in (B).

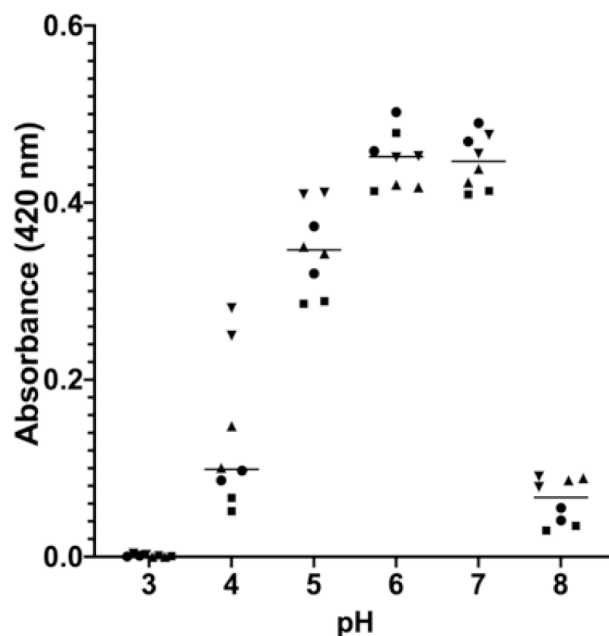

**Figure S3.** Release of 4-nitrophenol from chromogenic substrate 4-nitrophenyl- $\alpha$ -D-glucopyranoside at pH 3-8. Results from four independent experiments each with two technical replicates are shown. The  $\alpha$ -glucosidase (0.8 mM) was incubated with 10 mM substrate at different pH and amount of 4-nitrophenol released in 10 minutes was measured.



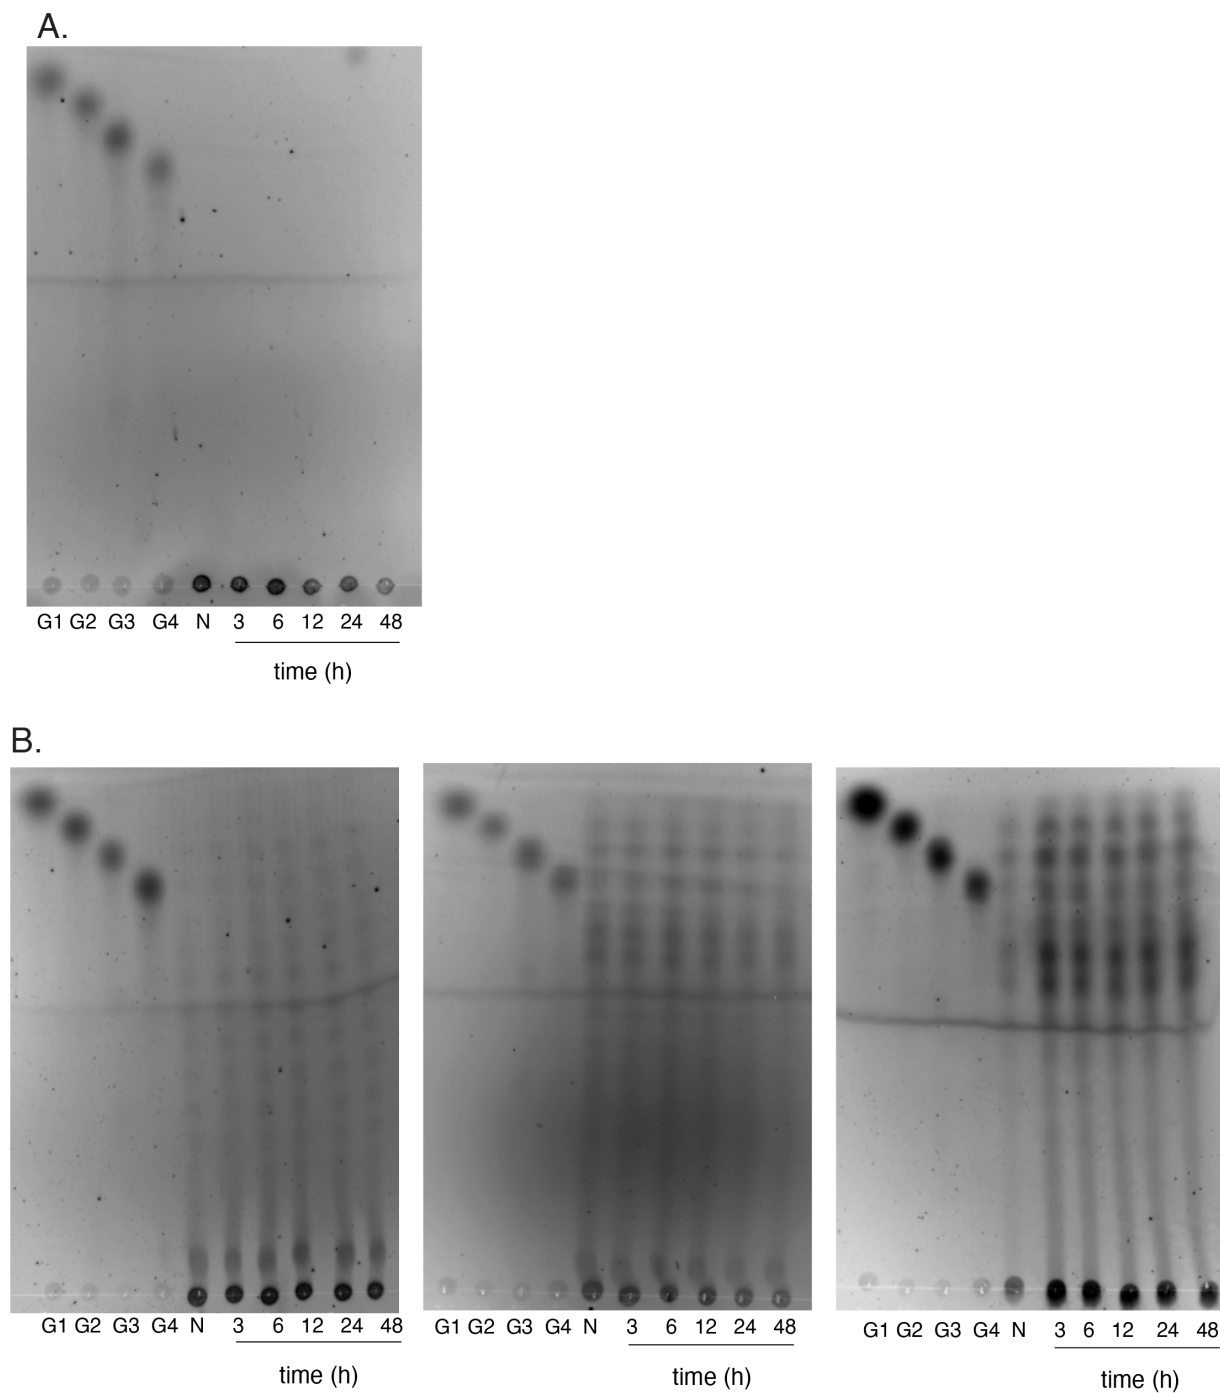

**Figure S4.** (A) TLC of products of glycogen hydrolysis by  $\alpha$ -glucosidase enzyme. Reaction mixtures were assessed at 3 h, 6 h, 12 h, 24 h and 48 h. N = Substrate with no enzyme. (B) TLC of products hydrolysis by  $\alpha$ -glucosidase enzyme of maltodextrins MD 4-7 (left panel), MD 13-17 (middle panel) and MD 16.5- 19.5 (right panel). Reaction mixtures were assessed at 3 h, 6 h, 12 h, 24 h and 48 h. N = Substrate with no enzyme.
